# Supplementary material for: Phase-changeable and bubble-releasing implants for highly efficient HIFU-responsive tumor surgery and chemotherapy
Source: Royal Society of Chemistry journal article supplement (doi:10.1039/c6tb01861k), 2016-01-01
Supplement: c6tb01861k1.pdf [file c6tb01861k1.pdf]

## Supporting information of

### **Phase-Changeable and Bubble-Releasing Implants for Highly Efficient HIFU-responsive Tumor Surgery and Chemotherapy**

Shige Wang,<sup>a</sup> Jiulong Zhao,<sup>b</sup> Fei Hu,<sup>a</sup> Xiang Li,<sup>c</sup> Xiao An,<sup>c\*</sup> Shilin Zhou,<sup>a</sup> Yu Chen,<sup>d\*</sup> and Mingxian Huang<sup>a\*</sup>

<sup>a</sup> College of Science, University of Shanghai for Science and Technology, No. 334 Jungong Road, Shanghai 200093, P.R. China

<sup>b</sup> Department of Gastroenterology, Changhai Hospital, Second Military Medical University, Shanghai 200433, People's Republic of China.

<sup>c</sup> Department of Neoplasms and Interventional Radiology, Shanghai First People's Hospital, School of Medicine, Shanghai Jiao Tong University, No. 100 Haining Road, Shanghai 200080, P.R. China

<sup>d</sup> State Key Laboratory of High Performance Ceramics and Superfine Microstructure, Shanghai Institute of Ceramics, Chinese Academy of Sciences, No. 1295 Dingxi Road, Shanghai 200050, P.R. China

\*To whom correspondence should be addressed email: 54andromeda@163.com, chenyu@mail.sic.ac.cn and hmx@usst.edu.cn

**Movie S1:** The swift phase change of PED oleosol upon contacting water. NMP was diffused into surrounding water and no apparent DOX and CO<sub>2</sub> MBs releasing can be found.

**Movie S2:** The swift breakdown of effervescent disintegrant (NaHCO<sub>3</sub> and citric acid) upon contacting saline.

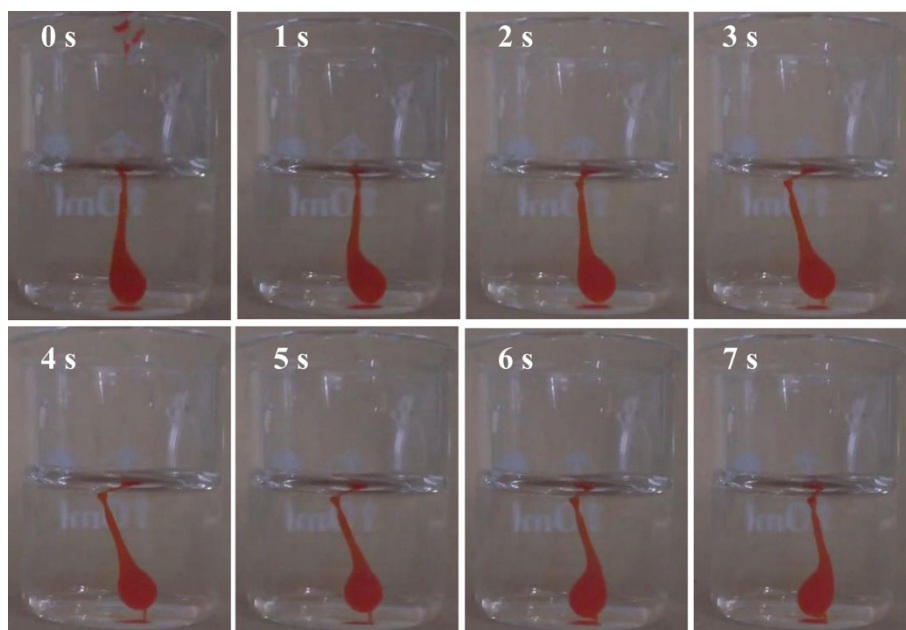

**Figure S1:** Time-dependent liquid-to-solid phase transition of PED oleosol upon contacting water (these images were originated from movie S1).

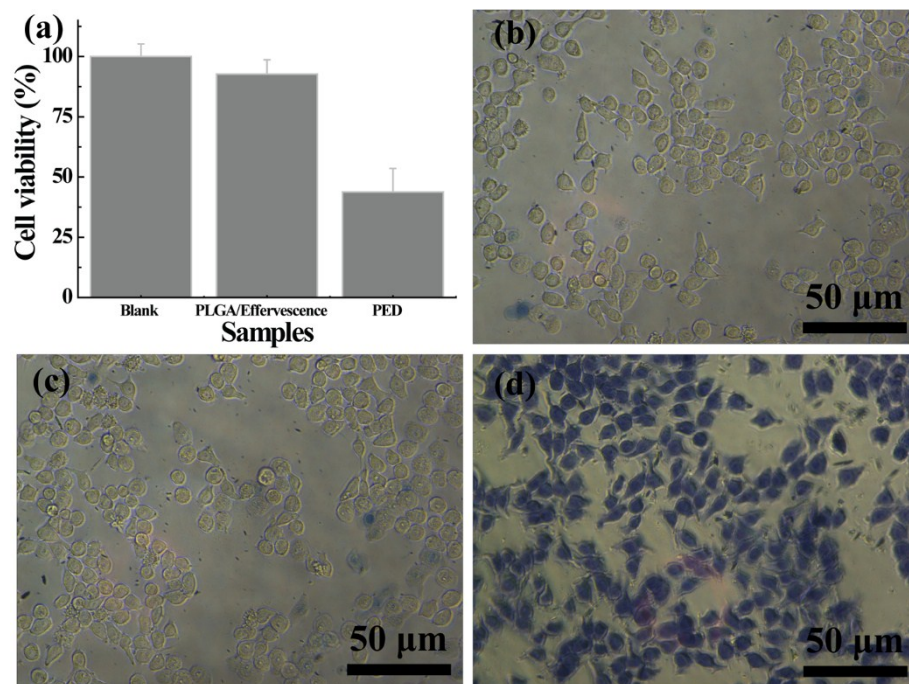

**Figure S2:** In vitro anti-tumor efficiency of different implants. (a) Cell viability of L929 cells after the treatment with saline (blank), PLGA/effervescent or PED implant, respectively. (b-d) Corresponding trypan blue staining results of cells treated with saline (blank), PLGA/effervescent or PED implant, respectively.
